# Supplementary material
Source: PubMed Central journal article supplement (PMC3749841)

Low

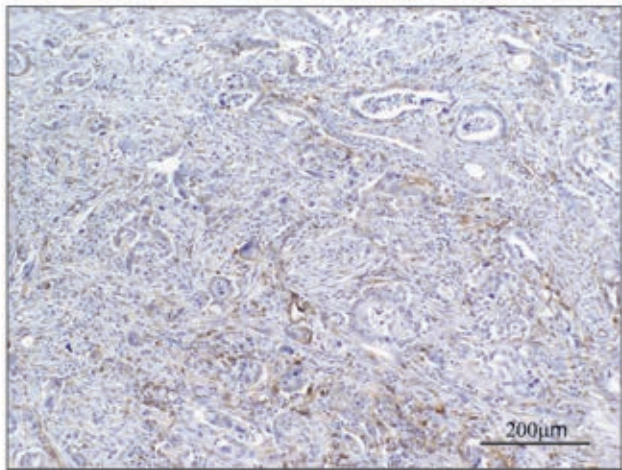

High

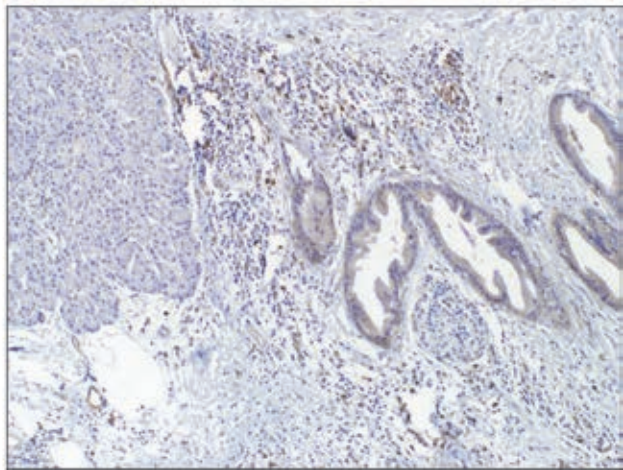

eNOS

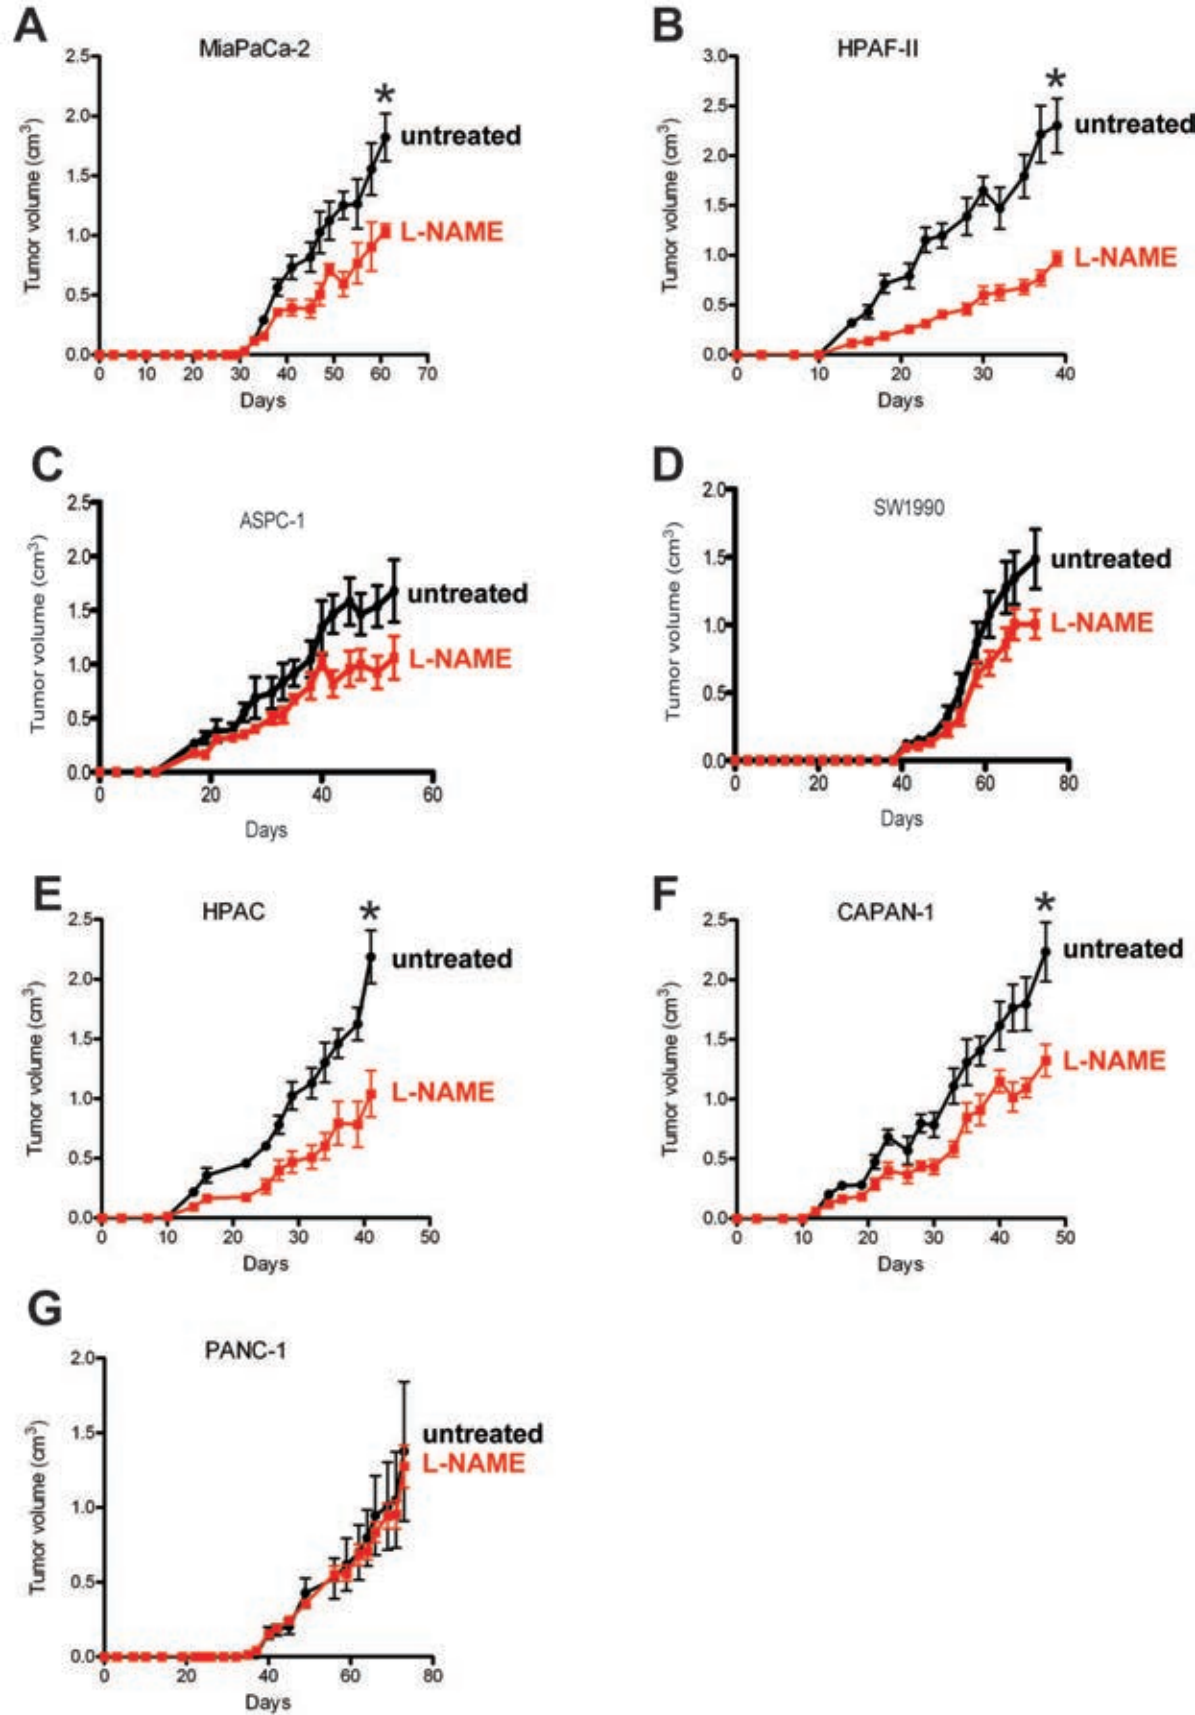

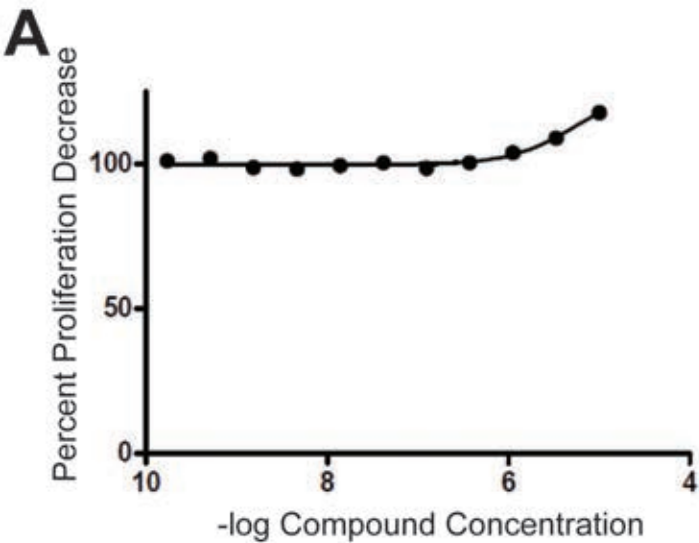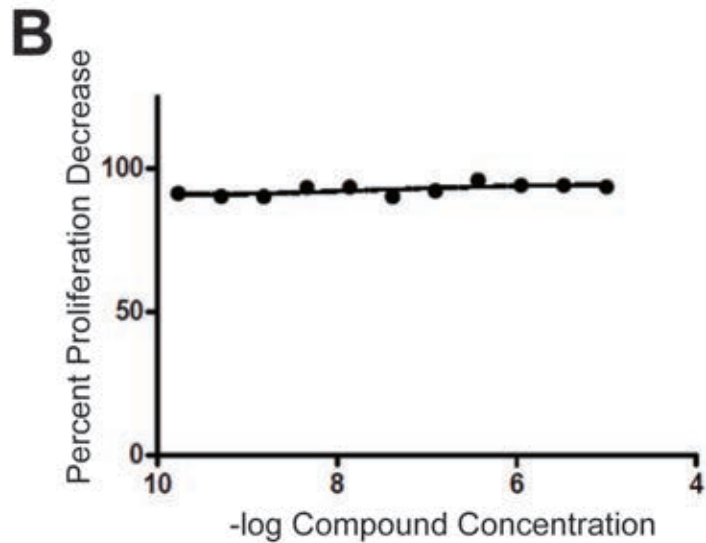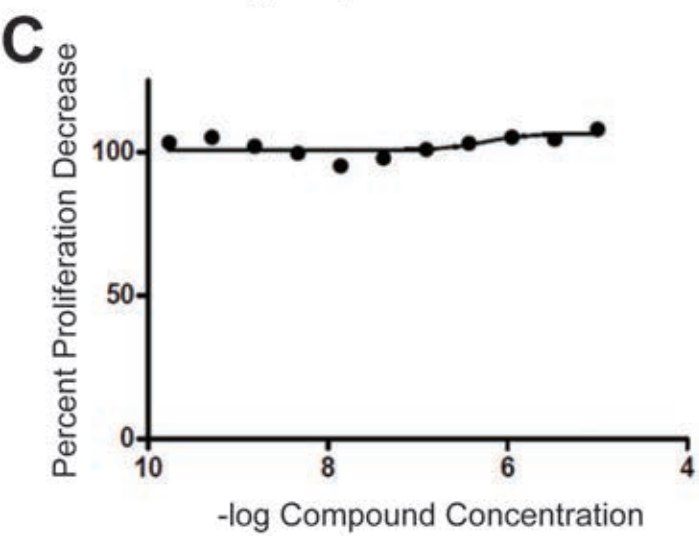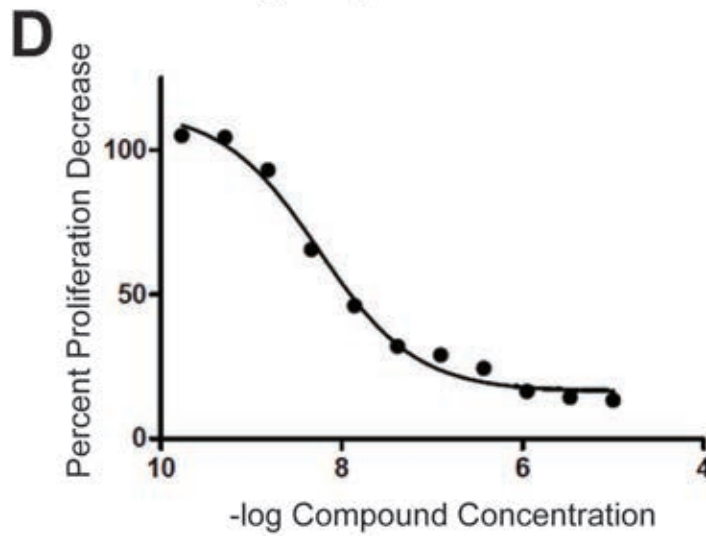

Supplement: NIHMS494357-supplement-Supp_Fig_1_to_3.pdf [file NIHMS494357-supplement-Supp_Fig_1_to_3.pdf]
